# Supplementary material
Source: publisher figshare collection journal article supplement (https://acs.figshare.com/ndownloader/files/3894727)
Supplement: Supplementary file 1 [file 3894727]

# Supporting Material for A Moving Window Formulation for Recursive Bayesian State Estimation of Systems with Irregularly Sampled and Variable Delays in Measurements

Vinay A. Bavdekar,<sup>†</sup> Jagadeesan Prakash,<sup>‡</sup> Sachin C. Patwardhan,<sup>¶</sup> and Sirish  
L. Shah<sup>\*,†</sup>

*Department of Chemical and Materials Engineering, University of Alberta, Edmonton, AB,  
Canada, T6G 2V4, Department of Instrumentation Engineering, Madras Institute of  
Technology, Anna University, Chennai, 600004, India, and Department of Chemical  
Engineering, Indian Institute of Technology Bombay, Powai, Mumbai, 400076, India.*

E-mail: slshah@ualberta.ca

## Tennessee Eastman Problem: process parameters

---

<sup>\*</sup>To whom correspondence should be addressed

<sup>†</sup>Department of Chemical and Materials Engineering, University of Alberta, Edmonton, AB, Canada, T6G 2V4

<sup>‡</sup>Department of Instrumentation Engineering, Madras Institute of Technology, Anna University, Chennai, 600004, India

<sup>¶</sup>Department of Chemical Engineering, Indian Institute of Technology Bombay, Powai, Mumbai, 400076, India.

Table 1: Tennessee Eastman process: steady state values of the process states

| No. | State    | Description    | Steady state<br>(kmol) | No. | State    | Description          | Steady state<br>(kmol) |
|-----|----------|----------------|------------------------|-----|----------|----------------------|------------------------|
| 1   | $N_{Ar}$ | A in reactor   | 4.722                  | 14  | $N_{Fs}$ | F in separator       | 0.71938                |
| 2   | $N_{Br}$ | B in reactor   | 1.9805                 | 15  | $N_{Gs}$ | G in separator       | 20.492                 |
| 3   | $N_{Cr}$ | C in reactor   | 3.4354                 | 16  | $N_{Hs}$ | H in separator       | 16.195                 |
| 4   | $N_{Dr}$ | D in reactor   | 0.18231                | 17  | $N_{Am}$ | A in feed zone       | 51.776                 |
| 5   | $N_{Er}$ | E in reactor   | 10.32                  | 18  | $N_{Bm}$ | B in feed zone       | 14.327                 |
| 6   | $N_{Fr}$ | F in reactor   | 1.2572                 | 19  | $N_{Cm}$ | C in feed zone       | 42.455                 |
| 7   | $N_{Gr}$ | G in reactor   | 66.06                  | 20  | $N_{Dm}$ | D in feed zone       | 11.10                  |
| 8   | $N_{Hr}$ | H in reactor   | 67.87                  | 21  | $N_{Em}$ | E in feed zone       | 30.156                 |
| 9   | $N_{As}$ | A in separator | 28.895                 | 22  | $N_{Fm}$ | F in feed zone       | 2.6668                 |
| 10  | $N_{Bs}$ | B in separator | 12.119                 | 23  | $N_{Gm}$ | G in feed zone       | 5.684                  |
| 11  | $N_{Cs}$ | C in separator | 21.022                 | 24  | $N_{Hm}$ | H in feed zone       | 2.6807                 |
| 12  | $N_{Ds}$ | D in separator | 0.09656                | 25  | $N_{Gp}$ | G in stripper bottom | 21.741                 |
| 13  | $N_{Es}$ | E in separator | 5.9052                 | 26  | $N_{Hp}$ | H in stripper bottom | 17.736                 |

Table 2: TE process: PI controller loops and their values

| Controlled variable                 | Process variable                | $K_c$   | $\tau_i$           |
|-------------------------------------|---------------------------------|---------|--------------------|
| Reactor pressure ( $P_r$ )          | Purge (F9)                      | -10.768 | $1 \times 10^{-3}$ |
| Reactor liquid level ( $V_{Lr}$ )   | E feed (F3)                     | 2.016   | 3.630              |
| Separator liquid level ( $V_{Ls}$ ) | Separator bottoms outflow (F10) | -2.975  | 0.130              |
| Stripper bottom level ( $V_{Lp}$ )  | Stripper bottoms outflow (F11)  | -3.1560 | 0.100              |
